1 **Pandemic ST131 *Escherichia coli* presenting the UPEC/EAEC and ExPEC/EAEC**  
2 **hybrid pathotypes recovered from extraintestinal infections in a clinical setting of the**  
3 **Brazilian Amazon region**

4

5 Nathália M. S. Bigli<sup>1</sup>, Érica L. Fonseca<sup>1,\*</sup>, Fernanda S. Freitas<sup>1</sup>, Sérgio M. Morgado<sup>1</sup> and  
6 Ana Carolina P. Vicente<sup>1</sup>

7

8 <sup>1</sup>Laboratório de Genética Molecular de Microrganismos, Instituto Oswaldo Cruz, FIOCRUZ,  
9 Rio de Janeiro, Brazil.

10

11 Correspondence: Érica L. Fonseca, [ericafon@ioc.fiocruz.br](mailto:ericafon@ioc.fiocruz.br)

12

13

14

15

16

17

18

19

20

21

22

23

24

25

26        **Abstract**

27            *Escherichia coli* is part of the commensal microbiota of human's and animal's gut.  
28        However, they may become pathogenic due to the acquisition of virulence factors that  
29        provide the ability to cause intestinal or extraintestinal infections, which makes *E. coli* the  
30        main cause of diarrheagenic diseases and urinary tract infections (UTIs) worldwide,  
31        respectively. Some strains, known as hybrids, may harbour a mix of virulence determinants  
32        of both diarrheagenic (DEC) and extraintestinal *E. coli* (ExPEC) pathotypes. Reports of  
33        hybrid *E. coli* in Brazil are rare, and the lineages associated with such pathotypes were poorly  
34        explored. This study aimed to characterize *E. coli* strains recovered from extraintestinal  
35        infections in a clinical setting of the Brazilian Amazon Region by means of lineage  
36        determination, antibiotic resistance profile, and investigation of DEC and ExPEC virulence  
37        markers. Fifteen ExPEC strains were recovered from distinct extraintestinal sites from  
38        inpatients of the General Hospital of Roraima (GHR), placed in the Brazilian Amazon region.  
39        Antibiotic susceptibility test revealed that all strains were multidrug-resistant and most of  
40        them, including those recovered from urine, were resistant to fluoroquinolones, the main  
41        therapeutic option for treating UTIs, probably due to the presence of Ser83Leu and  
42        Asp87Asn substitutions in GyrA. The MLST analysis revealed the polyclonal nature of these  
43        ExPEC strains since 11 STs were determined, including local and pandemic lineages, such as  
44        ST69 and ST131. Among the 15 isolates, 12 were classified as hybrids, due to the presence of  
45        the *aggR* virulence marker of the Enteroaggregative *E. coli* (EAEC) pathotype together with  
46        at least one ExPEC (*iutA*, *KPSMTII*, *sfaDE*, *papC*, *afaBC*, *iucD*) or Uropathogenic *E. coli*  
47        (UPEC) (*vat*, *fuyA*, *chuA* and *yfcV*) virulence determinants. These UPEC/EAEC (n=10) and  
48        ExPEC/EAEC (n=2) hybrid strains were found among distinct lineages, including new STs,  
49        and phylogroups (ST131/B2; ST1196/AxB1; ST9403/A; ST12394/A; NEW1-CC14/B2;  
50        NEW2-CC155/B1; NEW3-CC155/B1; NEW4-CC131/B2) and, for the first time, a hybrid

51 phenotype was found in the pandemic ST131 lineage in Brazil. Therefore, this study provides  
52 new information on the epidemiological scenario of hybrid *E. coli* strains, contributing to a  
53 better understanding of the occurrence and pathogenic potential of these organisms.

54

55 Keywords: HyPEC; ExPEC; ST69; ST131; virulence marker; pandemic lineage

56

## 57 INTRODUCTION

58 *Escherichia coli* inhabits the intestinal tract of humans and other animals as an  
59 important member of their microbiota [1]. However, the acquisition by horizontal gene  
60 transfer of virulence determinants by certain *E. coli* clones has enabled them to cause not  
61 only intestinal but also extraintestinal infections in different hosts. In this way, based on the  
62 body site of infection, the host, and the presence of specific virulence markers, these bacteria  
63 can be classified into diarrheagenic (DEC), mainly featured by the presence of specific  
64 virulence factors directly related to diarrhoea, and extraintestinal pathogenic (ExPEC) *E. coli*,  
65 defined primarily by their site of isolation [2]. The DEC group encompasses several  
66 pathotypes, including enterotoxigenic (ETEC), enteropathogenic (EPEC), enteroinvasive  
67 (EIEC), enteroaggregative (EAEC), and Shiga toxin-producing (STEC) *E. coli*. EPEC and  
68 EAEC are considered the major pathotypes of diarrheagenic *E. coli* causing disease  
69 worldwide, including in Brazil. These pathotypes carry genetic determinants involved with  
70 disease development and can be used as molecular markers of the pathotype.

71 The ExPEC group includes the pathotypes neonatal meningitis-associated (NMEC),  
72 human sepsis-associated (SEPEC), avian pathogenic (APEC), and uropathogenic (UPEC) *E.*  
73 *coli*, which is the most prevalent pathotype among extraintestinal infections worldwide.

74 UPEC is particularly associated with urinary tract infections (UTIs) and is a leading cause of

75 both community-acquired and healthcare-associated UTIs. Currently, the most frequently  
76 reported high-risk ExPEC lineages belonging to the MLST sequence type ST131, ST69,  
77 ST10, ST405, ST38, ST95, ST648, ST73 and ST1193, which are known for their high  
78 prevalence in extraintestinal infections worldwide and for their significant role in global  
79 spread of multidrug resistance [3].

80 Studies *in vivo* revealed that the presence of at least two of five virulence genes (*pap*,  
81 *afa/dra*, *sfa*, *kpsMTII*, and *iut/iuc*) could be enough to cause extraintestinal infection in  
82 immunocompetent individuals [4], and that *E. coli* co-harboring of *chuA*, *fyuA*, *vat*, and *yfcV*  
83 virulence genes were able to cause UTIs [5]. Additionally, due to horizontal gene transfer  
84 events, organisms may emerge as hybrid strains capable of causing intestinal and  
85 extraintestinal diseases due to the presence of virulence factors of both ExPEC and DEC  
86 pathotypes [6].

87 Strains harbouring a blend of virulence markers of different pathotypes have been  
88 described worldwide in both high-risk and local lineages, however, most of them correspond  
89 to hetero-pathogenic strains (characterized by a combination of virulence markers from DEC  
90 pathotypes) [7-9]. A recent study in South Africa demonstrated the high prevalence of several  
91 different DEC hybrid pathotypes, including strains sharing three virulence markers of three  
92 different DEC pathotypes, which were recovered from inanimate surfaces and presented a  
93 higher resistance profile compared to the classic pathotypes identified [8]. Another report  
94 demonstrated the occurrence of different DEC hybrid strains recovered from healthy  
95 individuals in Mexico [9].

96 In Brazil, few studies have characterized and reported the occurrence of hybrid  
97 strains in extraintestinal infection cases harbouring the combination of DEC and ExPEC or  
98 UPEC virulence markers, such as UPEC/EAEC, UPEC/aEPEC, ExPEC/STEC,

99 ExPEC/aEPEC [10-18]. However, there is a lack of association concerning the STs of such  
100 hybrid strains circulating in the country. Moreover, most of these reports on hybrid strains  
101 were restricted to São Paulo, a cosmopolitan city of the Southeast Brazilian region, and until  
102 now, all studies reporting *E. coli* infections in the Amazon Region were associated only with  
103 diarrheagenic infections [19-22]. Therefore, further studies are required to investigate the  
104 distribution and potential impact of these strains on the clinical outcomes of affected  
105 individuals. For these reasons, the objective of this study was to characterize *E. coli* strains  
106 recovered from extraintestinal infections in the Brazilian Amazon Region by means of  
107 lineage determination (MLST), antibiotic resistance profile, and investigation of DEC and  
108 ExPEC virulence markers.

## 109 **METHODS**

### 110 **Clinical data, bacterial strains and antimicrobial susceptibility test**

111 From December 2016 to February, 2018, 15 *E. coli* isolates were recovered from  
112 extraintestinal infection cases at the General Hospital of Roraima (GHR), placed in Boa  
113 Vista. The strains were isolated from blood (n=2), urine (n=7), catheter tip (n=1), vagina  
114 secretion (n=1), leg secretion (n=1), soft tissue (n=1), and operative wound secretion (n=2).  
115 Species identification was performed with the automated VITEK2, and confirmed by  
116 sequencing the 16S rRNA and the MLST genes. These strains are part of the Bacterial  
117 Culture Collection of the Laboratory of Molecular Genetics of Microorganisms, FIOCRUZ.

### 118 **Antimicrobial Susceptibility testing**

119           The antibiotic susceptibility profile was determined by disc-diffusion method  
120 according to clinical and laboratory standards institute (CLSI) guidelines [23] For the  
121 following antibiotics: gentamicin, amikacin, kanamycin, tobramycin, neomycin,  
122 streptomycin, imipenem, meropenem, ertapenem, cephalothin, cefoxitin, cefuroxime,  
123 ceftazidime, ceftriaxone, cefotaxime, cefepime, azithromycin, clarithromycin, erythromycin,  
124 ampicillin, ampicillin/sulbactam, amoxicillin, amoxicillin/clavulanic acid, carbenicillin,  
125 penicillin, aztreonam, piperacillin/tazobactam, ticarcillin/clavulanic acid, nalidixic acid,  
126 ciprofloxacin, norfloxacin, levofloxacin, ofloxacin, colistin sulphate, sulphonamide,  
127 trimethoprim, sulfamethoxazole/trimethoprim, chloramphenicol, fosfomycin, nitrofurantoin,  
128 tetracycline and minocycline.

#### 129 **Genotyping by Multilocus sequence typing (MLST)**

130           The genetic relationship among the ExPEC strains was established by MLST based  
131 on the Achtman MLST scheme (*adhA*, *fumC*, *gyrB*, *icd*, *mdh*, *purA* and *recA*)  
132 (<http://mlst.warwick.ac.uk>). Clonal complexes (CCs) were considered when sequence types  
133 (STs) shared five or more identical alleles taking into account the seven genes considered in  
134 the MLST scheme.

#### 135 **Detection of resistance genes by polymerase chain reaction (PCR) and sequencing**

136           The isolates were screened by PCR and sequencing for the presence of the genes  
137 frequently associated with  $\beta$ -lactam resistance in *E. coli* such as  
138 *bla*<sub>SHV</sub>, *bla*<sub>GES</sub>, *bla*<sub>TEM</sub>, *bla*<sub>CTX-M</sub> (class A  $\beta$ -lactamases). The plasmid-mediated  
139 fluoroquinolone (FQ) resistance *qnr* genes and the presence of mutations in the quinolone  
140 resistance-determining region (QRDR) of *gyrA* was also investigated (Table 1).

## 141 **Molecular Characterization of Hybrid Strains**

142           The presence of DEC and ExPEC virulence determinants was screened by PCR  
143 (Table 1). Those strains presenting at least one of the DEC pathotypes virulence markers  
144 were considered hybrid strains [13]. The DEC virulence factors screened were *eae* and *bfpB*  
145 genes, associated with epithelial adhesion in EPEC; the *aggR* gene, a universal regulator of  
146 EAEC virulence involved with the aggregative adhesion fimbriae (AAF) production; the *stx1*  
147 and *stx2* genes, related to the Shiga toxins production in STEC; the *estH*, *estP* and *eIT*,  
148 involved with the production of heat-stable and heat-labile toxins in ETEC; the *invE* gene that  
149 encodes a regulatory protein that controls the transcriptional of invasion genes in EIEC  
150 pathotype; the *vat*, *fuyA*, *chuA* and *yfcV*, all markers of UPEC; and ExPEC markers *iutA*,  
151 *KPSMTII*, *sfaDE*, *papC*, *afaBC*, *iucD*.

152

## 153 **RESULTS AND DISCUSSION**

154 The phenotypic analysis revealed that all *E. coli* ExPEC strains (n=15) were classified as  
155 multidrug-resistant (MDR) according to resistance classification criteria [24] (Table 1).  
156 Among the  $\beta$ -lactam antibiotics, all isolates were resistant to at least one of these antibiotics,  
157 and such phenotype could be explained by the presence of the *bla*<sub>TEM</sub> gene in 14/15 isolates.  
158 In fact, *bla*<sub>TEM</sub> is frequently associated with plasmids in *E. coli*, and it was the most prevalent  
159 gene among ExPEC recovered from UTI cases in São Paulo, Brazil [25]. However, although  
160 the *bla*<sub>CTX-M</sub> has been frequently associated with ExPEC in Brazil and worldwide [26], this  
161 gene was not found in our sample, as well as the other screened  $\beta$ -lactamase genes *bla*<sub>GES</sub> and  
162 *bla*<sub>SHV</sub>.

163           Moreover, a high prevalence of fluoroquinolone resistance was observed (73%)  
164 among the ExPEC strains. Although none of them carried any *qnr* allele, all FQ-resistant  
165 isolates presented mutations in the Quinolone Resistance-Determining Region (QRDR) of  
166 *gyrA* that led to the amino acid substitution Ser83Leu and Asp87Asn, known to be involved

167 with FQ resistance emergence [27]. Interestingly, these substitutions were recently reported  
168 as the determinants of FQ resistance in ExPEC strains recovered from UTI cases in São Paulo  
169 [12].

170 The MLST analysis revealed a great diversity, in which 11 STs were assigned to the  
171 15 ExPEC strains: ST69, ST131, ST8886, ST1196, ST9403, ST3180, ST12394, and four  
172 different new sequence types belonging to CC155 (n=2), CC14 (n=1) and CC131 (n=1),  
173 demonstrating the polyclonal nature of these hybrid strains. The most prevalent lineage  
174 among our sample was ST131, a pandemic clonal complex of the B2 phylogroup often  
175 associated with an arsenal of resistance and virulence genes, contributing to the success of  
176 this clone in spreading through clinical settings worldwide. The ST69 is another pandemic  
177 lineage belonging to the phylogroup D usually associated with clinics and food/environment  
178 contamination in several countries [27]. As found here, Lara and Colleagues have  
179 demonstrated the occurrence of ExPEC ST69 presenting the hybrid pathotype UPEC/EAEC  
180 in Brazil [10]. However, in spite of ST131 prevalence in Brazil, this is the first report of this  
181 lineage presenting a hybrid pathotype (UPEC/EAEC) in that country (Table 2).

182 Considering the *E. coli* virulome, 9/19 virulence factors characterizing DEC and  
183 ExPEC pathotypes were found in the studied samples in different frequencies and  
184 combinations (Table 2). The presence of at least one extraintestinal virulence marker was  
185 observed in all isolates, corroborating the nature of the infection sites from which they were  
186 recovered. The *iucD* gene, which is part of the operon involved with aerobactin siderophore  
187 synthesis, was the most prevalent ExPEC marker among the isolates (12/15). This gene is  
188 associated with iron uptake systems, facilitating its survival and pathogenicity and playing a  
189 crucial role in the bacteria's ability to cause infections and evade the host's immune response.  
190 Among the 15 ExPEC isolates analysed, 12 (80%) had at least one marker used to define  
191 ExPEC and DEC pathotypes, being characterized as hybrid strains. The three strains



192 classified as non-hybrids belonged to the pandemic lineages ST131/phylogroup B2 (EC44)  
193 and ST69/phylogroup D (EC39) and to the local ST8886 (EC40). Only 13 entries in  
194 Enterobase (<https://enterobase.warwick.ac.uk/species/index/ecoli>) have been found for  
195 ST8886, and in most cases, they corresponded to strains recovered from environmental sites  
196 in USA in 2015 and only one recovered from an animal source in Canada in 2022. Thus, this  
197 study reported the first clinical case belonging to this lineage.

198           Concerning the hybrid strains, it was verified the presence of UPEC/EAEC (n=10)  
199 and ExPEC/EAEC (n=2) (when UPEC markers were absent, or the strain had been recovered  
200 from a different body site other than urine). The *aggR* gene, considered a diarrheagenic factor  
201 that defines the EAEC pathotype, was found in all hybrid isolates, indicating that they would  
202 have the ability to cause intestinal disorders despite presenting in extraintestinal infections.  
203 EAEC is recognized as an important cause of diarrhoea worldwide and can be considered the  
204 most common DEC pathotype in *E. coli* in Brazil. However, *E. coli* strains with a hybrid  
205 enteroaggregative/uropathogenic (UPEC/EAEC) genotype have sporadically emerged as a  
206 cause of extraintestinal infections in Brazil [10-18]. Here we demonstrated the high  
207 prevalence of such hybrid pathotypes in distinct lineages causing infections in the Amazon  
208 region.

209           Most of UPEC/EAEC hybrid strains belonged to the pandemic and widespread ST131  
210 (one of them was assigned to a new ST of the CC131) (Table 2). They were recovered from  
211 distinct extraintestinal sites and presented a heterogeneous profile of virulence markers. The  
212 unique non-hybrid ST131 strain was the EC44, which was a UPEC recovered from UTI that  
213 presented both UPEC and ExPEC virulence markers. On the other hand, local STs (ST9403,  
214 ST3180 and ST12394) belonging to different phylogroups (A, B1 and B2) and recovered  
215 from distinct body sites, including blood, were also classified as UPEC/EAEC hybrid strains.

216 Interestingly, in spite of the diversity of infection sites, most of the ExPEC strains were  
217 recovered from urine, and all but one were resistant to the tested fluoroquinolones (Table 2),  
218 which are the first choice antibiotics for treating UTIs. These findings probably accounted for  
219 treatment failure, compromising the success of clinical outcomes.

220 Interestingly, in spite of the UPEC/EAEC EC49 strain being a new local ST of  
221 CC14/phylogroup B2, this isolate exhibited the highest number of ExPEC and UPEC  
222 virulence markers, besides the EAEC marker *aggR* (Table 2). This demonstrates that not only  
223 pandemic high-risk clones display an enhanced pathogenicity and that emerging strains may  
224 possess a high level of virulence fitness.

225 The other class of hybrids (ExPEC/EAEC) corresponded to strains (n=2) that  
226 carried ExPEC virulence markers and the *aggR* EAEC marker. The strains belonged to a new  
227 ST from CC155/phylogroup B1 (EC52) and to the local ST1196 belonging to phylogroup  
228 AxB1 (EC47) (Table 2). A recent study in Mozambique demonstrated that a hybrid  
229 ExPEC/EAEC strain recovered from blood belonged to the pandemic ST131 lineage and  
230 presented a remarkable virulence profile [28]. These findings revealed that ExPEC/EAEC  
231 hybrids are associated with distinct lineages. Interestingly, both ExPEC/EAEC strains  
232 identified here were recovered from urine although no UPEC virulence marker had been  
233 identified. This was also the case of the non-hybrid EC39 strain, belonging to the pandemic  
234 ST69/phylogroup D, that had been characterized as a UPEC pathotype due to the site of  
235 infection (urine), although all UPEC virulence markers were absent (Table 2). These  
236 findings suggest that their ability to infect the urinary tract would be related to other  
237 mechanisms that were not investigated in this study. In fact, UPEC employs various virulence  
238 strategies, such as binding to urinary tract epithelial cells, iron acquisition, toxin production,  
239 and evasion of the host's immune system. These virulence factors are commonly encoded by

240 genes found in pathogenicity islands (PAIs), which are often mobilized through horizontal  
241 gene transfer and could have been lost from those UPEC strains [14]. Furthermore, the  
242 presence of UPEC factors in strains recovered from sites other than urine, such as the non-  
243 hybrid EC40 strain (Table 2), demonstrates their ability to colonize and survive in the urinary  
244 tract, but also that other virulence determinants were involved in the establishment of  
245 extraintestinal infections in those cases.

## 246 **CONCLUSION**

247 This study contributes to a better understanding of the occurrence and pathogenic  
248 potential of hybrid strains of *E. coli*. Besides, the association of pathotype and lineage  
249 definition provides new information in the scenario of the global epidemiology of ExPEC  
250 hybrid strains.

251

## 252 **Funding information**

253 This work was supported by Oswaldo Cruz Institute grant, Fundação Coordenação de  
254 Aperfeiçoamento de Pessoal de Nível Superior (CAPES), Conselho Nacional de  
255 Desenvolvimento Científico e Tecnológico (CNPq) and Fundação Carlos Chagas Filho de  
256 Amparo à Pesquisa do Estado do Rio de Janeiro (FAPERJ), Processo SEI-  
257 260003/019688/2022.

258

## 259 **Conflicts of interest**

260 The authors declare that there are no conflicts of interest.

261

## 262 **Ethical statement**

263 This study was approved by the Oswaldo Cruz Foundation Ethics Committee (CAAE:  
264 39978114.5.0000.5248).

265

266 **References**

- 267 1. **Leimbach A, Hacker J, Dobrindt U.** E. coli as an all-rounder: the thin line between  
268 commensalism and pathogenicity. *Curr Top Microbiol Immunol* 2013;358:3-32.
- 269 2. **Sora VM, Meroni G, Martino PA, Soggiu A, Bonizzi L, et al.** Extraintestinal  
270 Pathogenic Escherichia coli: Virulence Factors and Antibiotic Resistance. *Pathogens*  
271 2021;10:1355.
- 272 3. **Kocsis B, Gulyás D, Szabó D.** Emergence and Dissemination of Extraintestinal  
273 Pathogenic High-Risk International Clones of Escherichia coli. *Life (Basel)* 2022;  
274 12:2077.
- 275 4. **Johnson JR, Murray AC, Gajewski A, Sullivan M, Snippes P, et al.** Isolation and  
276 molecular characterization of nalidixic acid-resistant extraintestinal pathogenic  
277 Escherichia coli from retail chicken products. *Antimicrob Agents Chemother*  
278 2003;47:2161-2168.
- 279 5. **Spurbeck RR, Dinh PC Jr, Walk ST, Stapleton AE, Hooton TM, et al.**  
280 Escherichia coli isolates that carry vat, fyuA, chuA, and yfcV efficiently colonize the  
281 urinary tract. *Infect Immun* 2012;80:4115-4122.
- 282 6. **Braz S, Melchior K, Moreira CG.** Escherichia coli as a Multifaceted Pathogenic and  
283 Versatile Bacterium. *Front Cell Infect Microbiol* 2020;10:1–9.
- 284 7. **Lee W, Sung S, Ha J, Kim E, An ES, et al.** Molecular and Genomic Analysis of the  
285 Virulence Factors and Potential Transmission of Hybrid Enteropathogenic and  
286 Enterotoxigenic Escherichia coli (EPEC/ETEC) Strains Isolated in South Korea. *Int J*  
287 *Mol Sci* 2023;24:12729.

- 288        8. **Rakhalaru P, Munzhedzi L, Abia ALK, Kabue JP, Potgieter N, et al.** Prevalence  
289            and Antimicrobial Resistance Profile of Diarrheogenic *Escherichia coli* from Fomites  
290            in Rural Households in South Africa. *Antibiotics (Basel)* 2023;12:1345.
- 291        9. **Méndez-Moreno E, Caporal-Hernandez L, Mendez-Pfeiffer PA, Enciso-**  
292            **Martínez Y, López RR, et al.** Characterization of Diarrheogenic *Escherichia coli*  
293            Strains Isolated from Healthy Donors, including a Triple Hybrid Strain. *Antibiotics*  
294            (*Basel*) 2022;11:833.
- 295        10. **Lara FBM, Nery DR, Oliveira PM, Araujo ML, Carvalho FRQ, et al.** Virulence  
296            Markers and Phylogenetic Analysis of *Escherichia coli* Strains with Hybrid  
297            EAEC/UPEC Genotypes Recovered from Sporadic Cases of Extraintestinal  
298            Infections. *Front Microbiol* 2017;8:146.
- 299        11. **Schüroff PA, Abe CM, Silva JW, Coelho CP, Andrade FB, et al.** Role of  
300            aggregate-forming pilus (AFP) in adherence and colonization of both intestinal and  
301            urinary tracts. *Virulence* 2022;13:1423-1433.
- 302        12. **Nascimento JAS, Santos FF, Valiatti TB, Santos-Neto JF, Santos ACM, et al.**  
303            Frequency and Diversity of Hybrid *Escherichia coli* Strains Isolated from Urinary  
304            Tract Infections. *Microorganisms* 2021;9:693.
- 305        13. **Nascimento JAS, Santos FF, Santos-Neto JF, Trovão LO, Valiatti TB, et al.**  
306            Molecular Epidemiology and Presence of Hybrid Pathogenic *Escherichia coli* among  
307            Isolates from Community-Acquired Urinary Tract Infection. *Microorganisms* 2022;  
308            10:302.

- 309        14. **Tanabe RHS, Dias RCB, Orsi H, de Lira DRP, Vieira MA, et al.** Characterization  
310            of Uropathogenic Escherichia coli Reveals Hybrid Isolates of Uropathogenic and  
311            Diarrheagenic (UPEC/DEC) E. coli. *Microorganisms* 2022;10:645.
- 312        15. **Furlan JPR, Ramos MS, Dos Santos LDR, Rosa RS, Stehling EG.** Multidrug-  
313            resistant Shiga toxin-producing Escherichia coli and hybrid pathogenic strains of  
314            bovine origin. *Vet Res Commun* 2023; online ahead of print.
- 315        16. **Munhoz DD, Richards AC, Santos FF, Mulvey MA, Piazza RMF.** E. coli  
316            Common pili promote the fitness and virulence of a hybrid aEPEC/ExPEC strain  
317            within diverse host environments. *Gut Microbes* 2023;15:2190308.
- 318        17. **de Lira DRP, Cavalcanti AMF, Pinheiro SRS, Orsi H, Dos Santos LF, et al.**  
319            Identification of a hybrid atypical enteropathogenic and enteroaggregative Escherichia  
320            coli (aEPEC/EAEC) clone of serotype O3:H2 associated with a diarrheal outbreak in  
321            Brazil. *Braz J Microbiol* 2021;52:2075-2079.
- 322        18. **Valiatti TB, Santos FF, Santos ACM, Nascimento JAS, Silva RM, et al.** Genetic  
323            and Virulence Characteristics of a Hybrid Atypical Enteropathogenic and  
324            Uropathogenic Escherichia coli (aEPEC/UPEC) Strain. *Front Cell Infect Microbiol*  
325            2020;10:492.
- 326        19. **Vicente AC, Teixeira LF, Iniguez-Rojas L, Luna MG, Silva L, et al.** Outbreaks of  
327            cholera-like diarrhoea caused by enterotoxigenic Escherichia coli in the Brazilian  
328            Amazon Rainforest. *Trans R Soc Trop Med Hyg* 2005;99:669-674.
- 329        20. **Benevides-Matos N, Pieri FA, Penatti M, Orlandi PP.** Adherence and virulence  
330            genes of Escherichia coli from children diarrhoea in the Brazilian Amazon. *Braz J*  
331            *Microbiol* 2015;46:131-137.

- 332        21. **Taborda RLM, Silva LAD, Orlandi PP, Batista FS, Rodrigues RS, et al.**  
333            Characterization of enteroaggregative *Escherichia coli* among diarrheal children in  
334            Western Brazilian Amazon. *Arq Gastroenterol* 2018;55:390-396.
- 335        22. **Rodrigues RS, Lima NCDS, Taborda RLM, Esquerdo RP, Gama AR, et al.**  
336            Antibiotic resistance and biofilm formation in children with Enteropathogenic  
337            *Escherichia coli* (EPEC) in Brazilian Amazon. *J Infect Dev Ctries* 2019;13:698-705.
- 338        23. **Clinical and Laboratory Standards Institute.** *Performance Standards for*  
339            *Antimicrobial Susceptibility Testing supplement M100*. 32nd Ed. Wayne, PA: CLSI;  
340            2021.
- 341        24. **Magiorakos AP, Srinivasan A, Carey RB, Carmeli Y, Falagas ME, et al.**  
342            Multidrug-resistant, extensively drug-resistant and pandrug-resistant bacteria an  
343            international expert proposal for interim standard definitions for acquired resistance.  
344            *Clin Microbiol Infect* 2012;18:268–281.
- 345        25. **Santos-Neto JF, Santos ACM, Nascimento JAS, Trovão LO, Santos FF, et al.**  
346            Virulence Profile, Antibiotic Resistance, and Phylogenetic Relationships among  
347            *Escherichia coli* Strains Isolated from the Feces and Urine of Hospitalized Patients.  
348            *Pathogens* 2022;11:1528.
- 349        26. **Bevan ER, Jones AM, Hawkey PM.** Global epidemiology of CTX-M  $\beta$ -lactamases:  
350            temporal and geographical shifts in genotype. *J Antimicrob Chemother* 2017;  
351            72:2145–2155.
- 352        27. **Riley LW.** Pandemic lineages of extraintestinal pathogenic *Escherichia coli*. *Clin*  
353            *Microbiol Infect* 2014;20:380-390.
- 354        28. **Santona A, Sumbana JJ, Fiamma M, Deligios M, Taviani E, et al.** High-risk  
355            lineages among extended-spectrum  $\beta$ -lactamase-producing *Escherichia coli* from

356 extraintestinal infections in Maputo Central Hospital, Mozambique. *Int J Antimicrob*

357 *Agents* 2022;60:106649.

358

359

360

361

362

363

364

365

366

367

368

369

370

371

372

373

374

375

376

377

378

379

380

381



382 **Table 1. Primers used in this study**

| Primer name                        | Primer sequence (5' – 3')      | Target                                                            |
|------------------------------------|--------------------------------|-------------------------------------------------------------------|
| <b>Antibiotic resistance genes</b> |                                |                                                                   |
| SHV F                              | TTCATGGCGTTACCTTTGAC           | Class A $\beta$ -lactamase <i>bla</i> <sub>SHV</sub> genes        |
| SHV R                              | CCGACAGAGTGC GG TATTTA         |                                                                   |
| GES F                              | ATGCGCTTCATTACGCAC             | ESBL Class A $\beta$ -lactamase <i>bla</i> <sub>GES</sub> genes   |
| GES R                              | CTATTTGTCCGTGCTCAGGA           |                                                                   |
| TEM F                              | GTATCCGCTCATGAGACAATA          | Class A $\beta$ -lactamase <i>bla</i> <sub>TEM</sub> genes        |
| TEM R                              | TCTAAAGTATATATGAGTAAACTTGGTCTG |                                                                   |
| CTX-M F                            | CGCTTTGCGATGTGCAG              | ESBL Class A $\beta$ -lactamase <i>bla</i> <sub>CTX-M</sub> genes |
| CTX-M R                            | ACCGCGATATCGTTGGT              |                                                                   |
| QnrVC F                            | AAGTGAACCTTCTCACATCAGG         | Quinolone resistance <i>qnrVC</i> genes                           |
| QnrVC R                            | ATGATTACCCCTAATTGCTCC          |                                                                   |
| QnrA F                             | GATTTCTCACGCCAGGATTT           | Quinolone resistance <i>qnrA</i> gene                             |
| QnrA R                             | TCKGAGCCCATCAAGGAAG            |                                                                   |
| QnrB F                             | GATCGWGAAAGYCAGAAAGG           | Quinolone resistance <i>qnrB</i> gene                             |
| QnrB R                             | CCACARYTCRCAYTTTTTC            |                                                                   |
| QnrC F                             | TGCAGACCTACGAGATGCTT           | Quinolone resistance <i>qnrC</i> gene                             |
| QnrC R                             | TTCACGCCAGTTAAATCCAC           |                                                                   |
| QnrS F                             | ACGTGTTAACTTGC GTGAT           | Quinolone resistance <i>qnrS</i> gene                             |
| QnrS R                             | GCAATTTTGATACCTGATG            |                                                                   |
| GyrA F                             | CGTTGGTGACGTAATCGGTA           | QRDR of <i>gyrA</i> gene                                          |
| GyrA R                             | GTGTTCCATCAGCCCTTCA            |                                                                   |
| <b>Virulence genes</b>             |                                |                                                                   |
| Eae F                              | GTGGCGAATACTGGCGAGACT          | EPEC virulence marker                                             |
| Eae R                              | CGACGGTGAAAAAGAATGGGG          |                                                                   |
| BfpB F                             | CGATAAACTGATACTGGGCAGC         | EAEC virulence marker                                             |
| BfpB R                             | GTGCTTCCCGAACAGTCACT           |                                                                   |
| AggR F                             | CGATACATTAAGACGCCTAAAG         | STEC virulence marker                                             |
| AggR R                             | TCTGATACATTA AATTCATCTGC       |                                                                   |
| Stx1 F                             | CAGTTAATGTGGTGGCGAAGG          | STEC virulence marker                                             |
| Stx1 R                             | CACCAGACAATGTAACCGCTG          |                                                                   |
| Stx2 F                             | ATCCTATTCCCGGGAGTTTACG         | STEC virulence marker                                             |
| Stx2 R                             | GCGTCATCGTATACACAGGAGC         |                                                                   |
| EstH F                             | GCTAAACCAGTAGAGTC              | ETEC virulence marker                                             |
| EstH R                             | CACCCGGTACAAGCAGG              |                                                                   |
| EstP F                             | AGTCAGTCAACTGAATCAC            | ETEC virulence marker                                             |
| EstP R                             | ATTTTCTCAGACCAATAC             |                                                                   |
| eIT F                              | CACACGGAGCTCCTCAG              | EIEC virulence marker                                             |
| eIT R                              | CAAAC TAGTTTTCCATACTG          |                                                                   |
| invE F                             | CGATAGATGGCGAGAAATTATATCCCG    | EIEC virulence marker                                             |
| invE R                             | CGATCAAGAATCCCTAACAGAAGAATCA   |                                                                   |
| Vat F                              | TCAGGACACGTT CAGGCATT CAGT     | UPEC virulence marker                                             |
| Vat R                              | GGCCAGAACATTTGCTCCCTTGTT       |                                                                   |
| FyuA F                             | GTAACAATCTTCCCGCTCGGCAT        | UPEC virulence marker                                             |
| FyuA R                             | TGACGATTAACGAACCGGAAGGGA       |                                                                   |
| ChuA F                             | CTGAAACCATGACCGTTACG           | UPEC virulence marker                                             |
| ChuA R                             | TTGTAGTAACGCACTAAACC           |                                                                   |
| yfcV F                             | ACATGGAGACCAGTTCACC            |                                                                   |

|           |                           |                        |
|-----------|---------------------------|------------------------|
| yfcV R    | GTAATCTGGAATGTGGTCAGG     |                        |
| iutA F    | GGCTGGACATCATGGGAACTGG    |                        |
| iutA R    | CGTCGGGAACGGGTAGAATCG     |                        |
| KpsMTII F | GCGCATTTGCTGATACTGTTG     |                        |
| KpsMTII R | CATCCAGACGATAAGCATGAGCA   |                        |
| sfaDE F   | CTCCGGAGAACTGGGTGCATCTTAC |                        |
| sfaDE R   | CGGAGGAGTAATTACAAACCTGGCA |                        |
| papC F    | GTGGCAGTATGAGTAATGACCGTTA | ExPEC virulence marker |
| papC R    | ATATCCTTTCTGCAGGGATGCAATA |                        |
| afaBC F   | GGCAGAGGGCCGGCAACAGGC     |                        |
| afaBC R   | CCCGTAACGCGCCAGCATCTC     |                        |
| iucD F    | TCCTCATTTTTCTGGCATC       |                        |
| iucD R    | AGTTTATTTCCGCCGCTTCT      |                        |

---

383

384

385

386

387

388

389

390

391

392

393

394

395

396

397

398

399

400

401

**Table 2. Clinical and genetic information of the hybrid *E. coli* strains in this study**

| Strain | Infection site | ST   | CC  | Phylogroup | Antibiotic resistance profile                                                                                                      | Pathotype Genetic Markers |               |                   | Hybrid Classification |
|--------|----------------|------|-----|------------|------------------------------------------------------------------------------------------------------------------------------------|---------------------------|---------------|-------------------|-----------------------|
|        |                |      |     |            |                                                                                                                                    | DEC                       | EXPEC         | UPEC              |                       |
| EC39   | Urine          | 69   | 69  | D          | NEO, CEF, CLA, ERI, CB, AMP, PEN, SXT, SUL, TMP                                                                                    | -                         | <i>kpsMTH</i> | -                 | -                     |
| EC40   | Blood          | 8886 | -   | B2         | NEO, CXM, AZI, CLA, ERI, AMP, PEN, SXT, SUL, TMP<br>KAN, NEO, STR, CEF, FOX, CXM, CAZ, CRO,                                        | -                         | -             | <i>fyuA, yfcV</i> | -                     |
| EC41   | Leg secretion  | 131  | 131 | B2         | CTX, FEP, AMP, AMX, CB, PEN, TIM, CLA, ERI, NAL, CIP, NOR, LEV, OFX, SXT, SUL, TMP, MIN<br>GEN, TOB, KAN, NEO, STR, CEF, FOX, CXM, | <i>aggR</i>               | <i>iucD</i>   | <i>fyuA, yfcV</i> | UPEC/EAEC             |
| EC42   | Urine          | 131  | 131 | B2         | CAZ, CRO, CTX, FEP, AMP, SAM, AMX, AMC, CB, PEN, TIM, ATM, CLA, ERI, NAL, CIP, NOR,                                                | <i>aggR</i>               | <i>iucD</i>   | <i>yfcV</i>       | UPEC/EAEC             |

|      |                     |       |     |      |                                                                                                                                                                                                                       |             |                                            |                   |            |  |
|------|---------------------|-------|-----|------|-----------------------------------------------------------------------------------------------------------------------------------------------------------------------------------------------------------------------|-------------|--------------------------------------------|-------------------|------------|--|
|      |                     |       |     |      | LEV, OFX, SXT, SUL, TMP, MIN, TET                                                                                                                                                                                     |             |                                            |                   |            |  |
| EC43 | Catheter tip        | 131   | 131 | B2   | NEO, STR, CEF, FOX, CXM, CAZ, CRO, CTX,<br>FEP, AMP, AMX, CB, PEN, TIM, AZI, CLA, ERI,<br>NAL, CIP, NOR, LEV, OFX, SXT, SUL, TMP, TET                                                                                 | <i>aggR</i> | <i>iutA, kpsMTII, iucD</i>                 | <i>yfcV</i>       | UPEC/EAEC  |  |
| EC46 | Soft tissue         | NEW 4 | 131 | B2   | GEN, TOB, KAN, NEO, CEF, FOX, CXM, CAZ,<br>CRO, CTX, FEP, AMP, SAM, AMX, AMC, CB,<br>PEN, TIM, ATM, CLA, NAL, CIP, NOR, LEV, OFX                                                                                      | <i>aggR</i> | <i>iutA, kpsMTII,</i><br><i>papC, iucD</i> | <i>fyuA, yfcV</i> | UPEC/EAEC  |  |
| EC47 | Urine               | 1196  | -   | AxB1 | KAN, NEO, CEF, AMP, CB, PEN, AZI, CLA, ERI,<br>NAL, CIP, NOR, LEV, OFX                                                                                                                                                | <i>aggR</i> | <i>iutA, afaBC</i>                         | -                 | EXPEC/EAEC |  |
| EC48 | Vagina<br>secretion | 9403  | -   | A    | KAN, NEO, STR, AMP, CB, PEN, AZI                                                                                                                                                                                      | <i>aggR</i> | <i>iutA, kpsMTII,</i><br><i>papC, iucD</i> | <i>fyuA, yfcV</i> | UPEC/EAEC  |  |
| EC44 | Urine               | 131   | 131 | B2   | GEN, TOB, KAN, NEO, STR, CEF, FOX, CXM,<br>CAZ, CRO, CTX, FEP, AMP, SAM, AMX, AMC,<br>CB, PEN, TIM, ATM, AZI, CLA, ERI, NAL, CIP,<br>NOR, LEV, OFX, SXT, SUL, TMP, TET<br><br>TOB, KAN, NEO, STR, CEF, FOX, CXM, CAZ, | -           | <i>iutA, kpsMTII,</i><br><i>papC iucD</i>  | <i>fyuA, yfcV</i> | -          |  |

|      |                    |       |     |    |                                                                                                                                                                   |             |                                             |                            |            |
|------|--------------------|-------|-----|----|-------------------------------------------------------------------------------------------------------------------------------------------------------------------|-------------|---------------------------------------------|----------------------------|------------|
| EC45 | Urine              | 131   | 131 | B2 | CRO, CTX, FEP, AMP, SAM, AMX, AMC, CB,<br>PEN, TIM, TZP, ATM, AZI, CLA, ERI, NAL, CIP,<br>NOR, LEV, OFX, SXT, SUL, TMP                                            | <i>aggR</i> | <i>iutA, kpsMTII,<br/>afaBC, iucD</i>       | <i>fyuA, yfcV</i>          | UPEC/EAEC  |
| EC49 | Urine              | NEW 1 | 14  | B2 | KAN, NEO, STR, CEF, CTX, AMP, SAM, AMX,<br>AMC, CB, PEN, TIM, AZI, CLA, ERI, NAL, CIP,<br>NOR, LEV, OFX, SXT, SUL, TMP                                            | <i>aggR</i> | <i>iutA, kpsMTII,<br/>papC, afaBC, iucD</i> | <i>vat, fyuA,<br/>yfcV</i> | UPEC/EAEC  |
| EC50 | -                  | 3180  | 14  | B2 | KAN, NEO, STR, CRO, AMP, PEN, AZI, CLA,<br>ERI, NAL, CIP, NOR, LEV, OFX, CHL                                                                                      | <i>aggR</i> | <i>iutA, kpsMTII, iucD</i>                  | <i>yfcV</i>                | UPEC/EAEC  |
| EC51 | Blood              | NEW 2 | 155 | B1 | KAN, NEO, STR, CEF, CRO, AMP, SAM, AMX,<br>CB, PEN, TIM, CLA, ERI, SXT, SUL, TMP, MIN,<br>TET                                                                     | <i>aggR</i> | <i>iutA, iucD</i>                           | <i>fyuA</i>                | UPEC/EAEC  |
| EC52 | Urine              | NEW 3 | 155 | B1 | AMP, PEN, CLA, NAL, CIP, NOR, LEV, OFX, MIN                                                                                                                       | <i>aggR</i> | <i>iutA, afaBC, iucD</i>                    | -                          | EXPEC/EAEC |
| EC53 | wound<br>secretion | 12394 | 46  | A  | AMK, GEN, TOB, KAN, NEO, STR, CEF, FOX,<br>CXM, CAZ, CRO, CTX, FEP, AMP, SAM, AMX,<br>CB, PEN, TIM, ATM, AZI, CLA, ERI, NAL, CIP,<br>NOR, LEV, OFX, TMP, MIN, TET | <i>aggR</i> | <i>iutA, iucD</i>                           | <i>fyuA</i>                | UPEC/EAEC  |

Abbreviations: AMK, amikacin; GEN, gentamicin; TOB, tobramycin; KAN, kanamycin; NEO, neomycin; STR, streptomycin; CEF, cephalothin; FOX, cefoxitin; CXM, cefuroxime; CAZ, ceftazidime; CRO, ceftriaxone; CTX, cefotaxime; FEP, cefepime; AMP, ampicillin; SAM, ampicillin/sulbactam; AMX, amoxicillin; AMC, amoxicillin/clavulanate; CB, carbenicillin; PEN, penicillin; TIM, ticarcillin/clavulanate; TZP, piperacillin/tazobactam; ATM, aztreonam; AZI, azithromycin; CLA, clarithromycin; ERI, erythromycin; NAL, nalidixic acid; CIP, ciprofloxacin; NOR, norfloxacin; LEV, levofloxacin; OFX, ofloxacin; SXT, trimethoprim/sulfamethoxazole; SUL, sulphonamide; TMP, trimethoprim; MIN, minocycline; tetracycline; CHL, chloramphenicol.

## ExPEC strains presenting hybrid pathotypes in the Amazon region

**UPEC/EAEC and ExPEC/EAEC**  
(new STs, local STs and pandemic ST131)

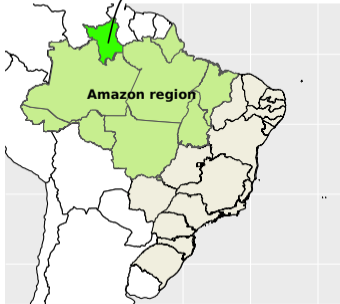

Source: https://medrxiv.org/content/10.1101/2024.03.11.24304096v1.full.pdf
